# Supplementary material
Source: ML conference proceedings conference paper supplement (https://openreview.net/forum?id=GLTRUmg5Nl)
Supplement: supplementary_material [file attachment]

Perceive with the classifier and directly observe facts

Lidar image  
(Streaming Data)

Facts of Time and Weather

| Fact and Evidence Variables | Value |
|-----------------------------|-------|
| Time                        | Busy  |
| Weather                     | Rainy |
| CarsDetected                | True  |

Infer on query variables

| Query Variables | Value | Probability |
|-----------------|-------|-------------|
| Crowded         | True  | 0.995       |
|                 | False | 0.005       |
| Cooperative     | True  | 0.030       |
|                 | False | 0.970       |

## Perceptual Reasoning

| Action | Observation |
|--------|-------------|
| signal | False       |
| signal | True        |
| move   | False       |
| move   | True        |
| merge  | N/A         |

Compute the initial state belief  $b$

## Interaction
