# Supplementary material
Source: ML conference proceedings conference paper supplement (https://openreview.net/forum?id=GLTRUmg5Nl)

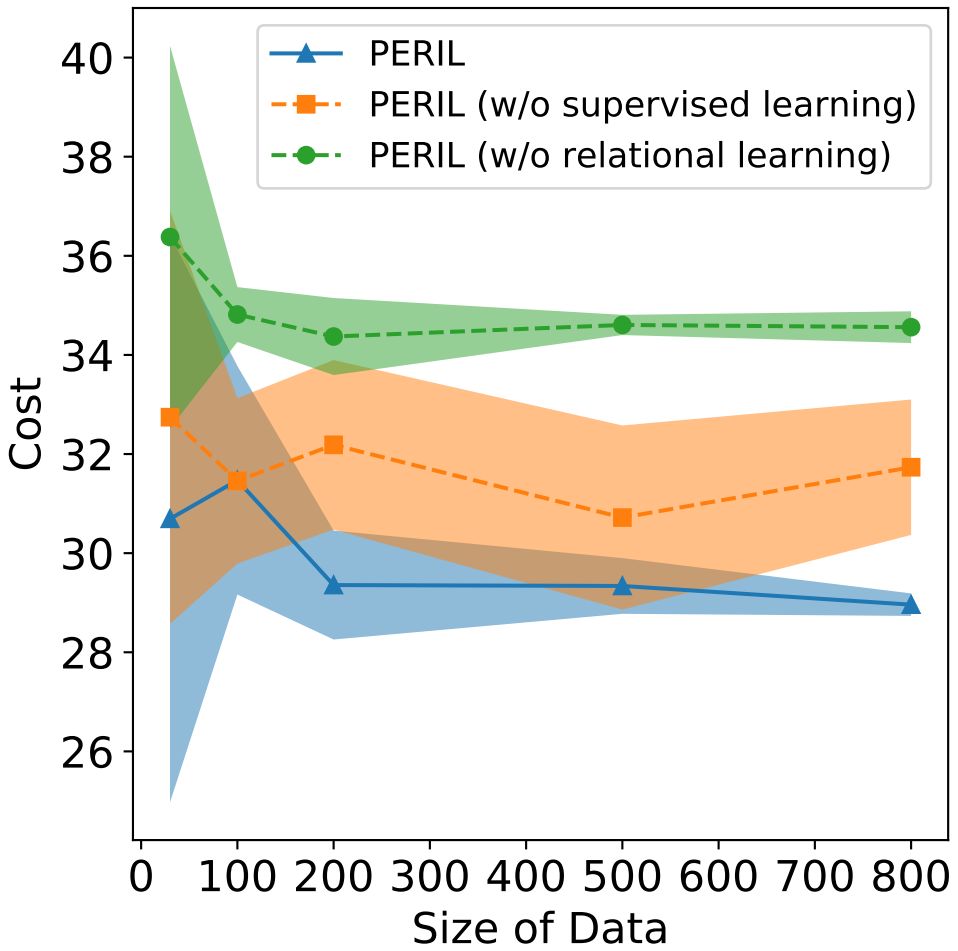

Supplement: supplementary_material [file attachment]

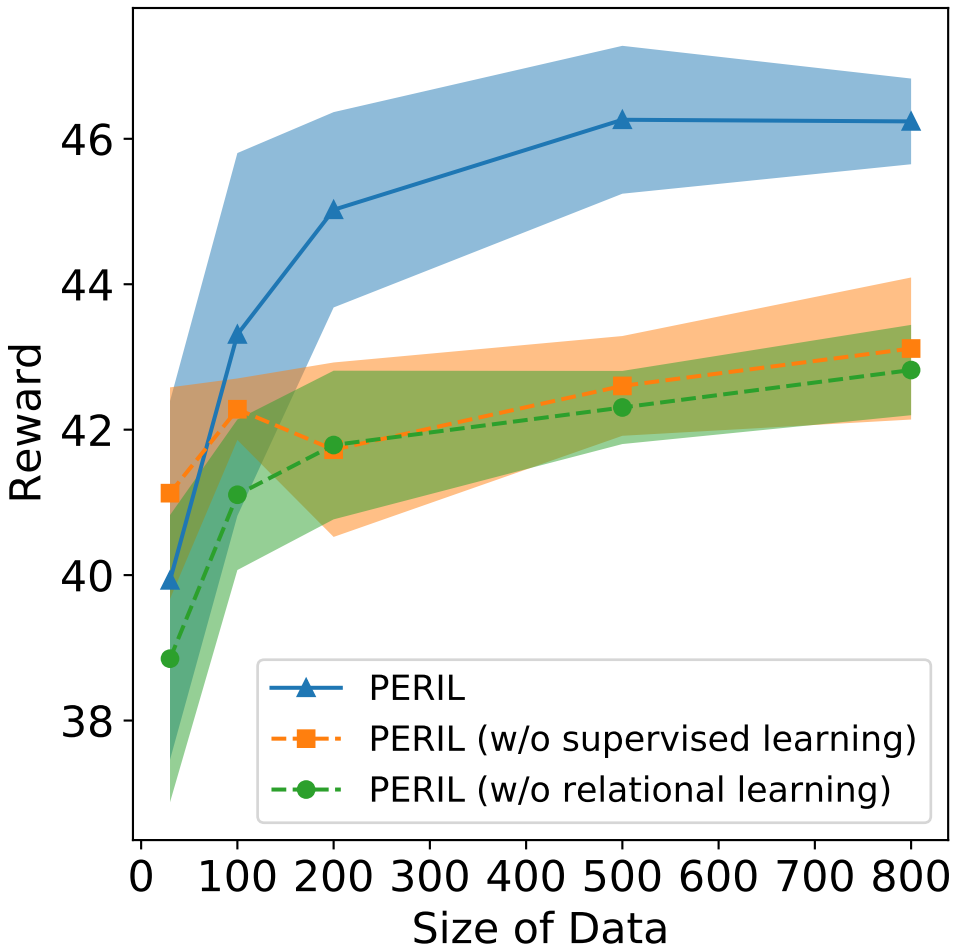

Supplement: supplementary_material [file attachment]

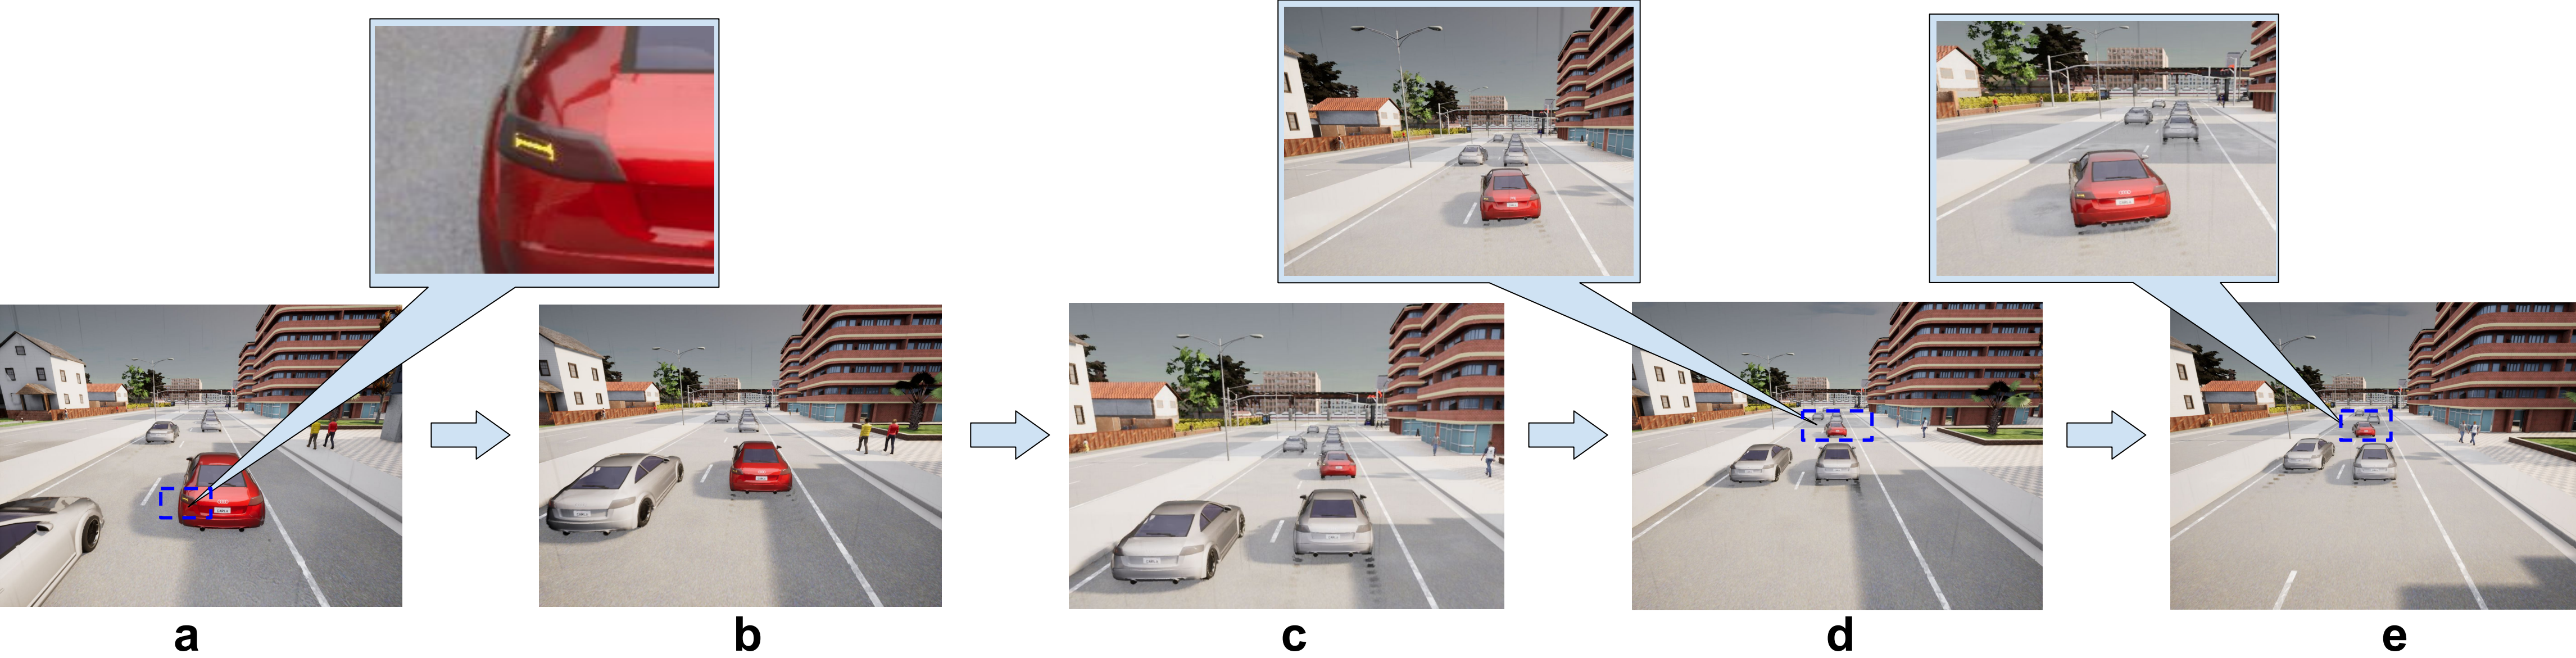

**a**

**b**

**c**

**d**

**e**

Supplement: supplementary_material [file attachment]

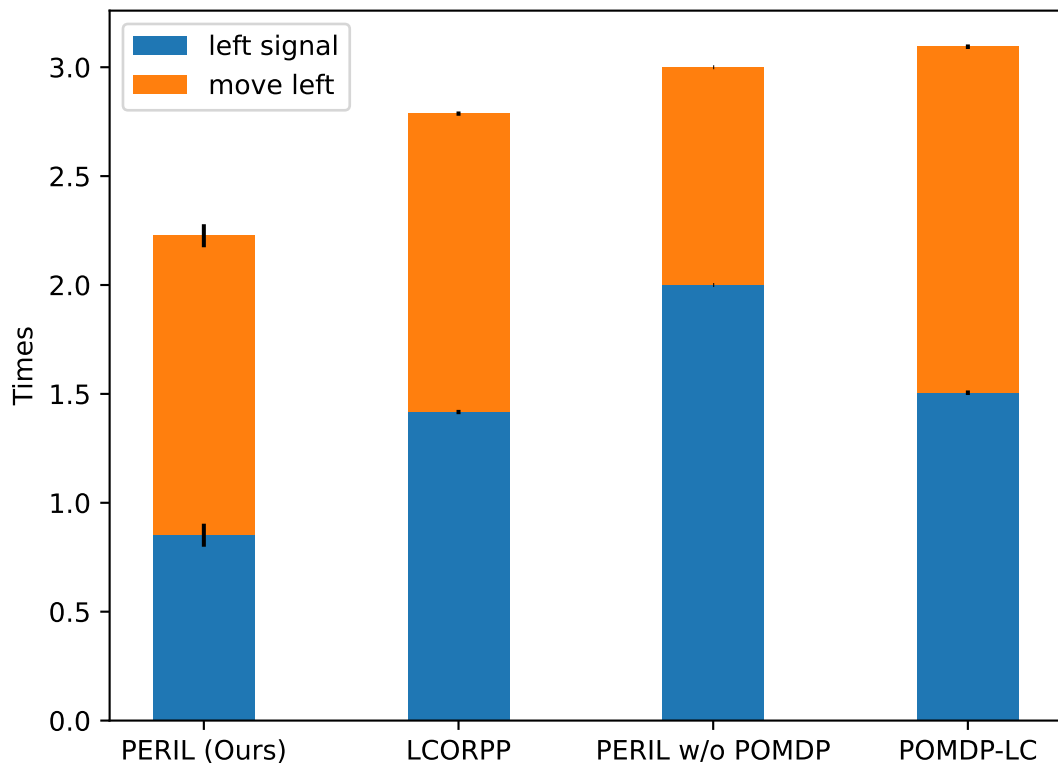

Supplement: supplementary_material [file attachment]

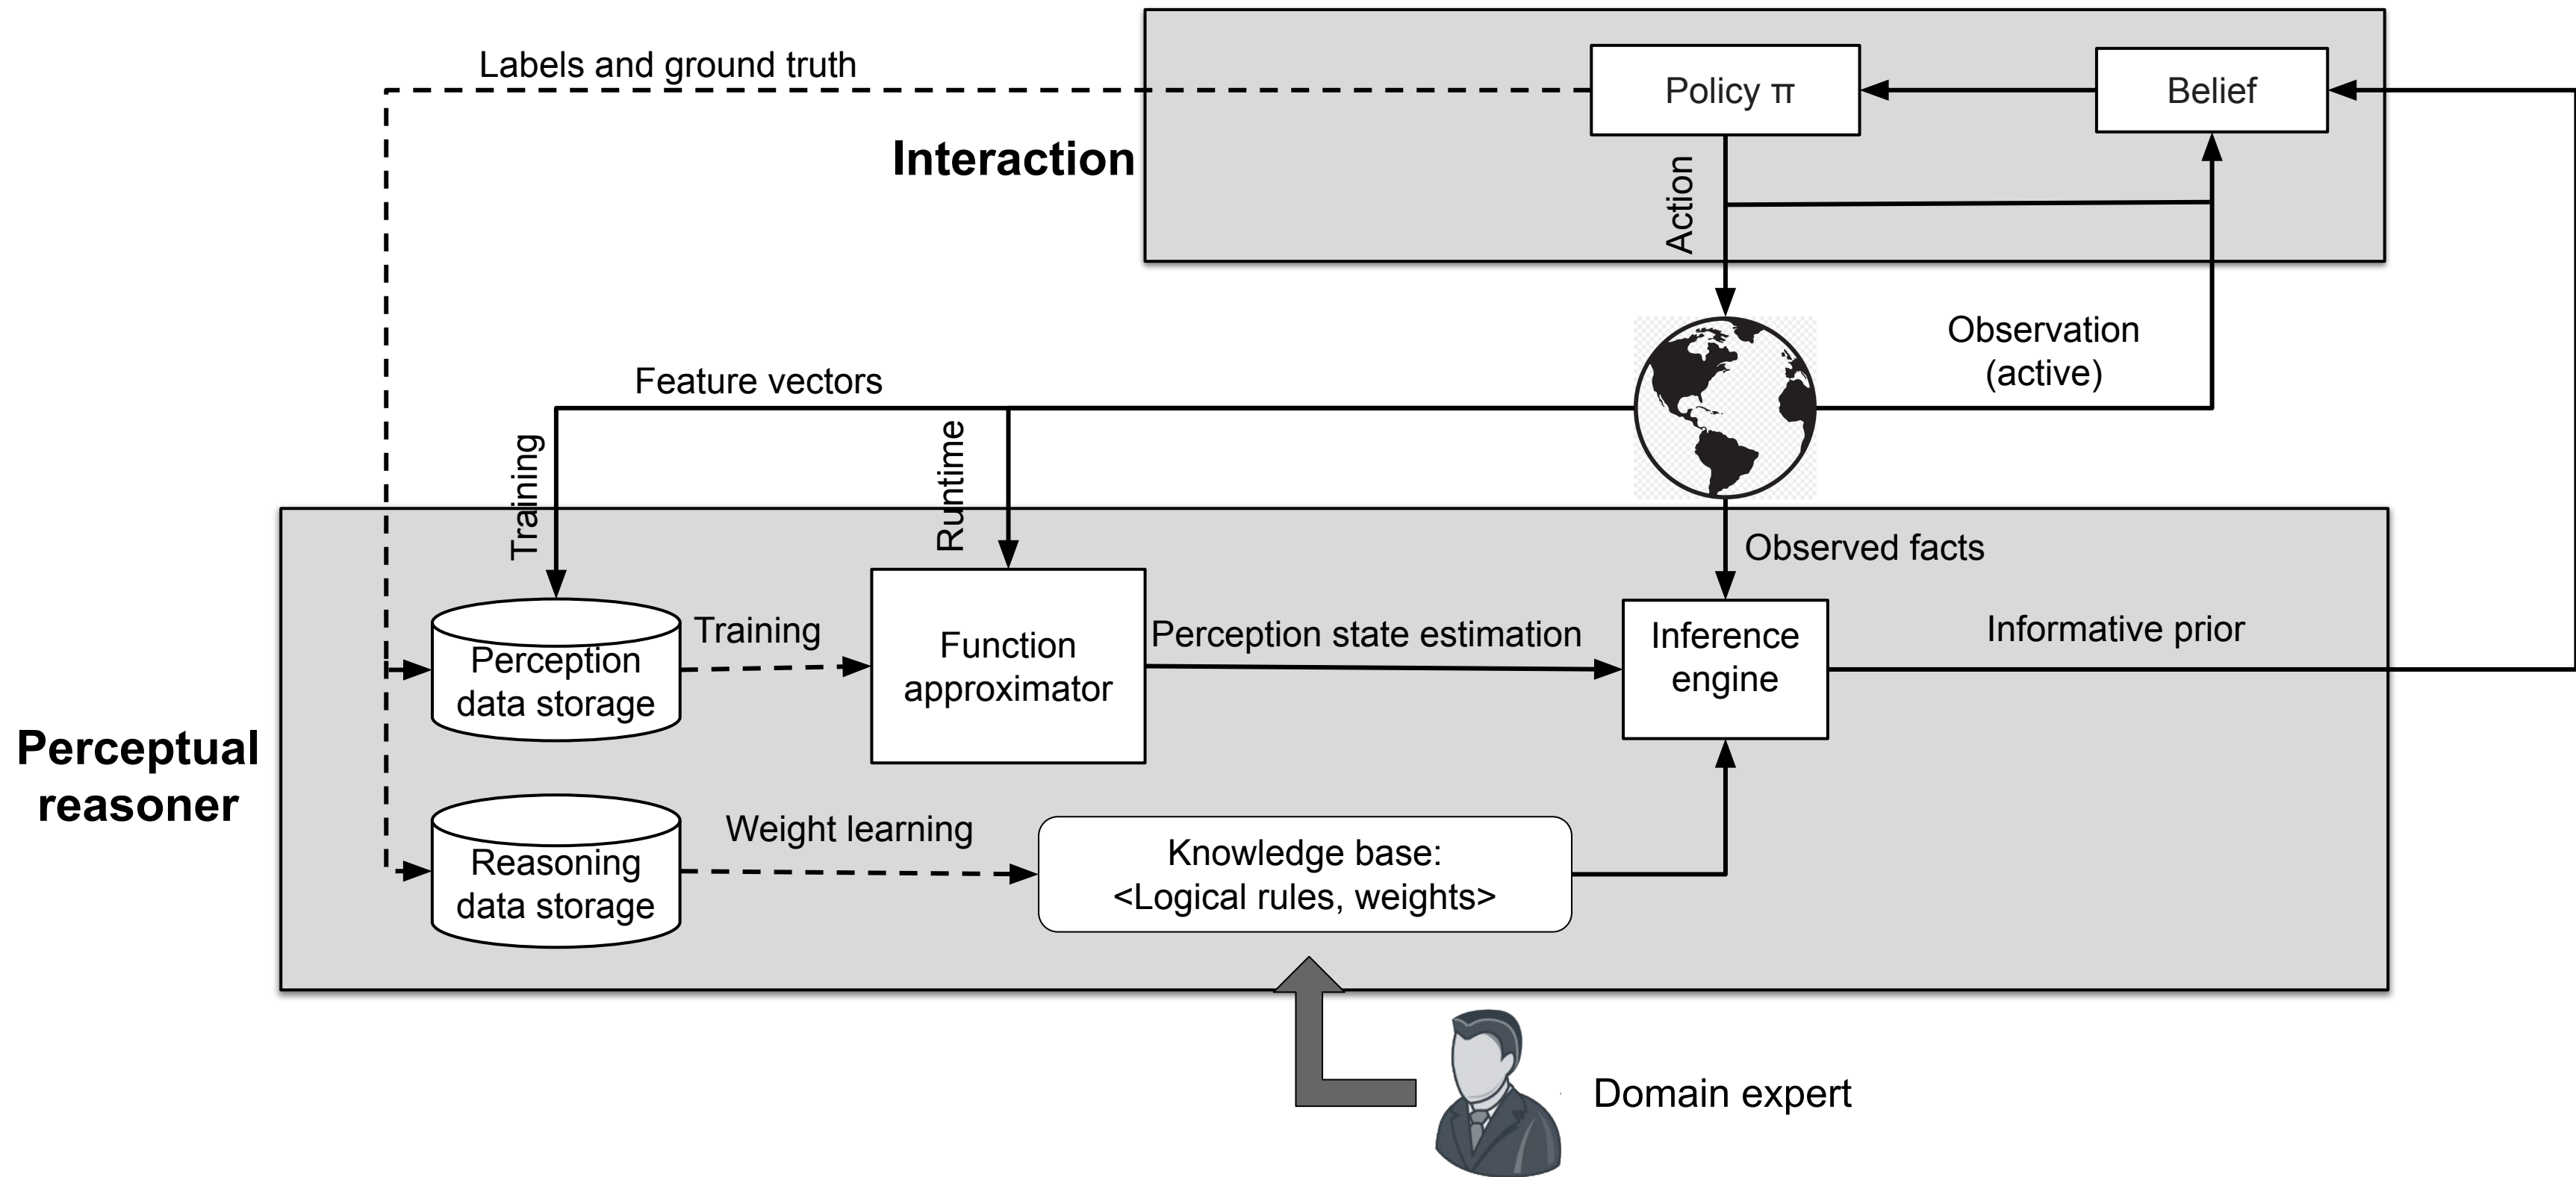

Supplement: supplementary_material [file attachment]

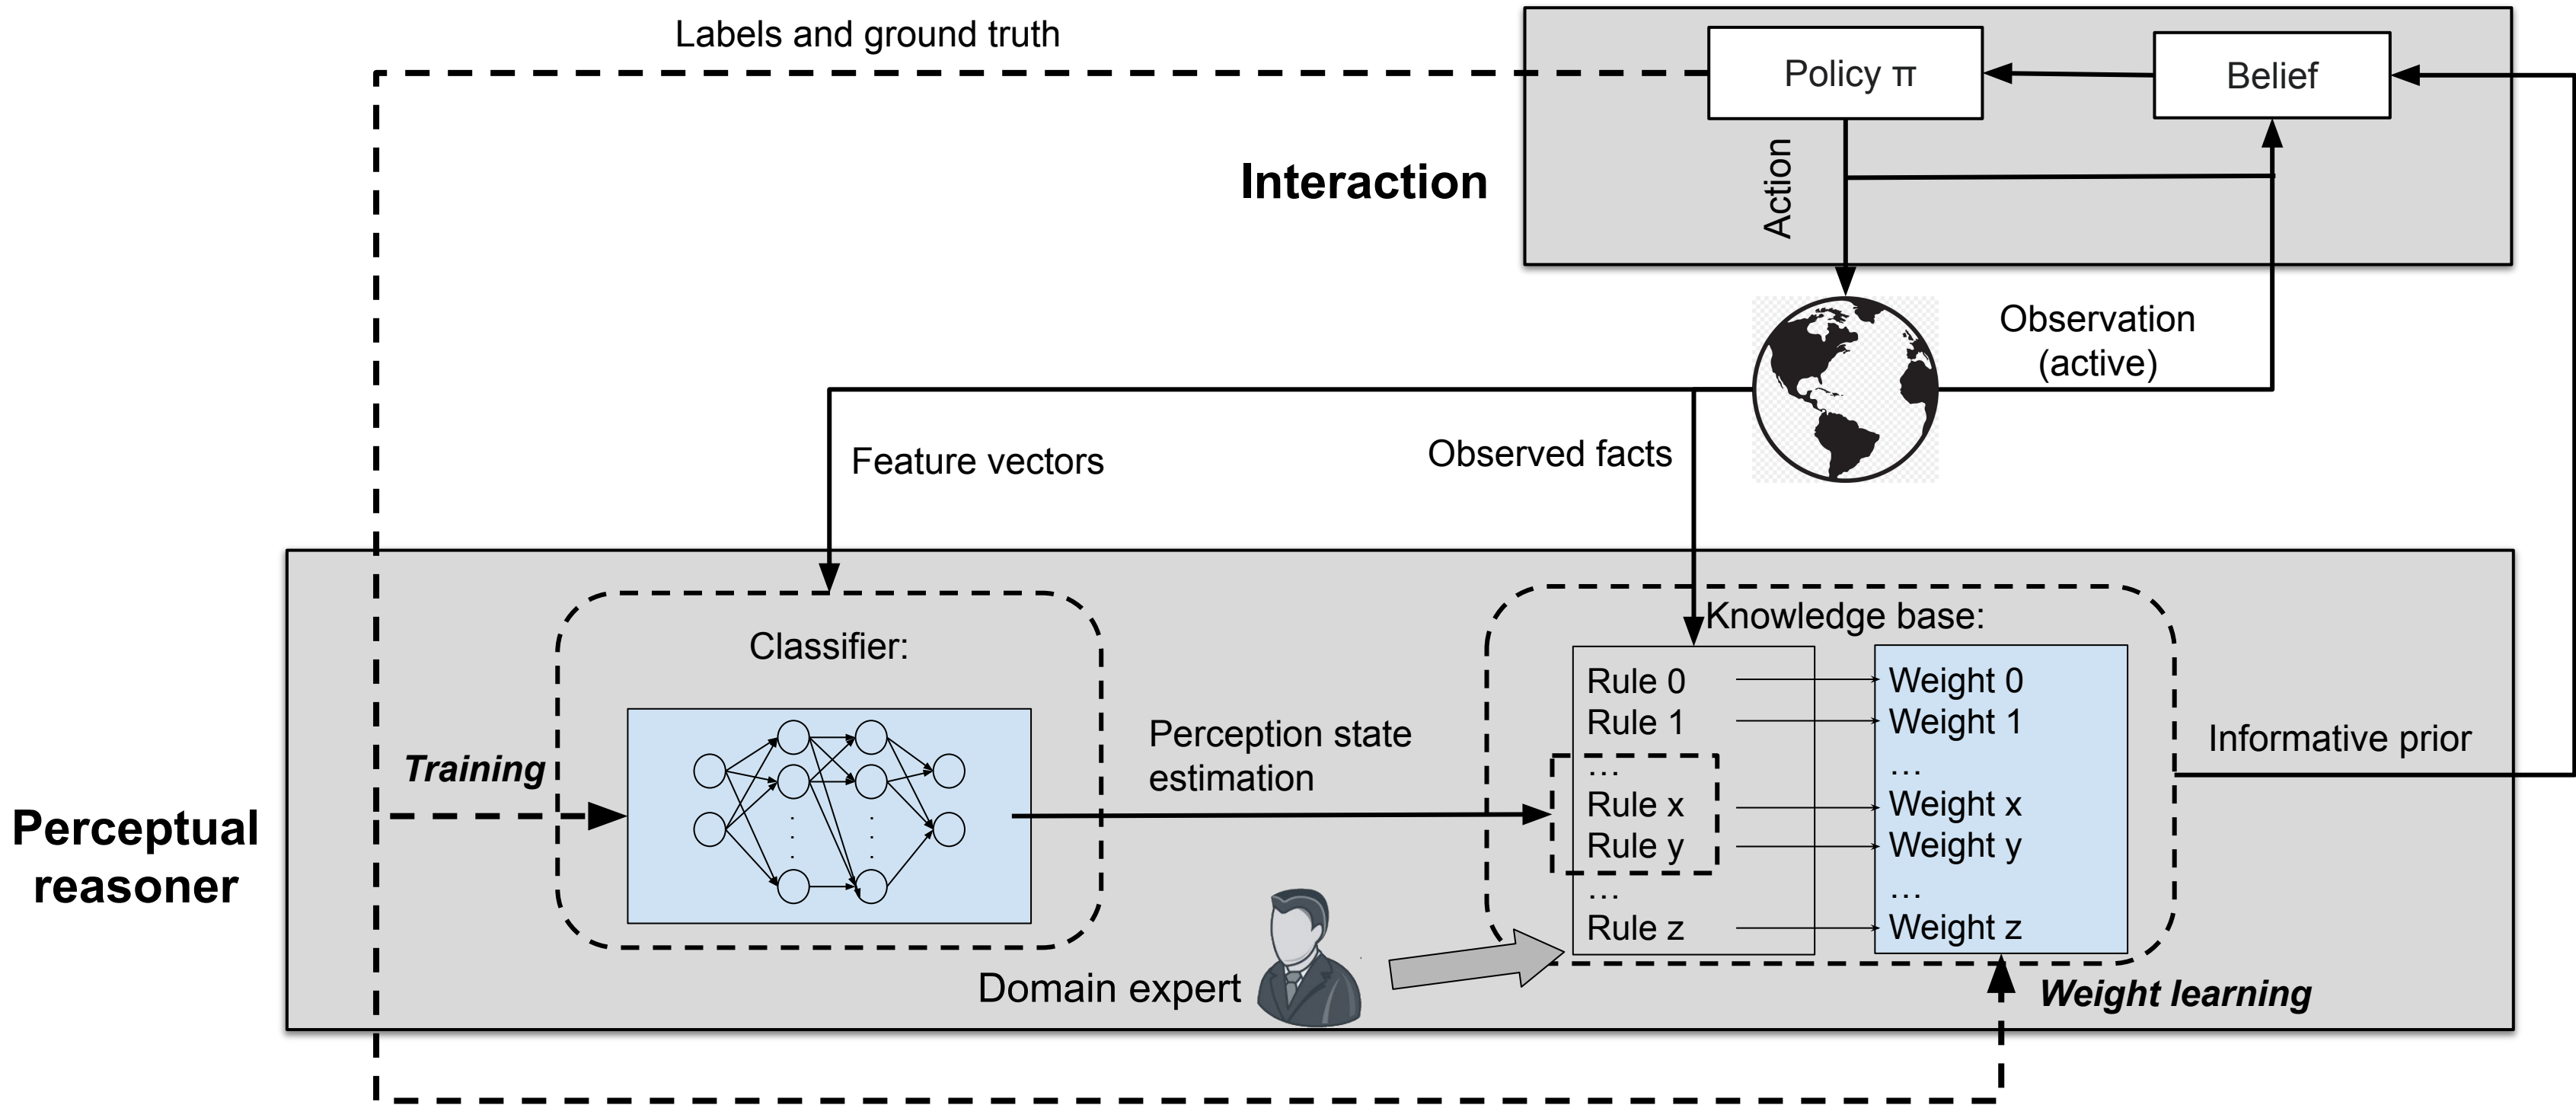

Supplement: supplementary_material [file attachment]

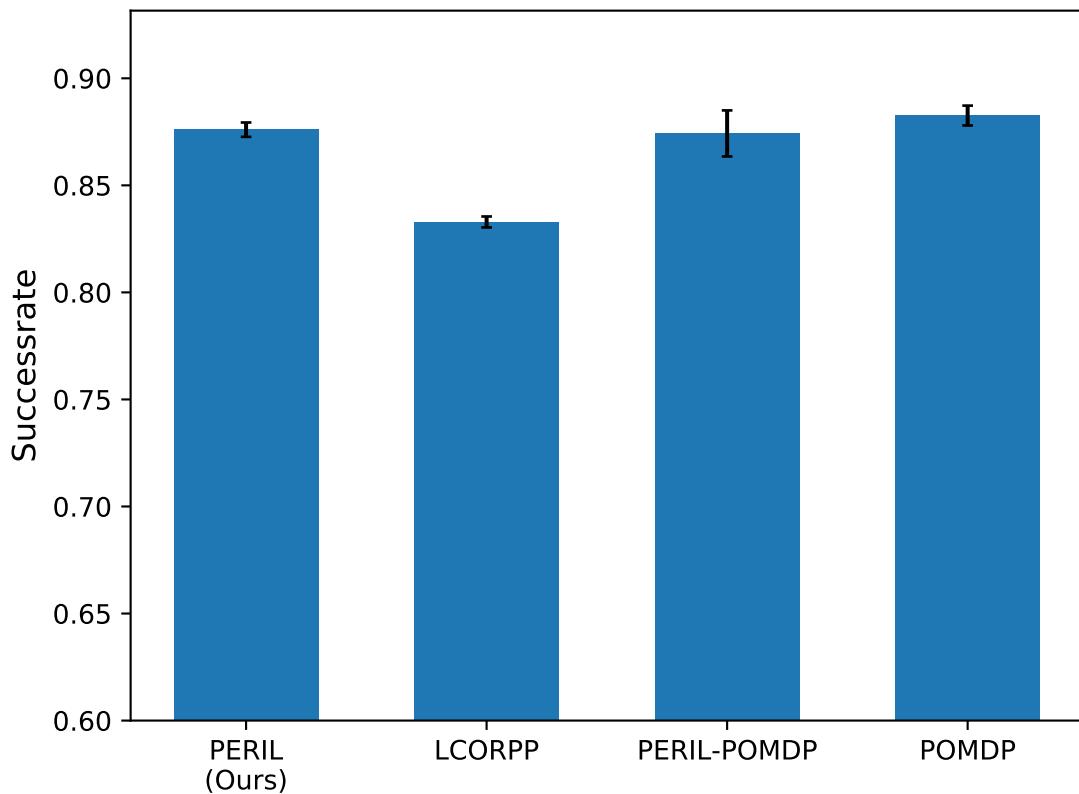

Supplement: supplementary_material [file attachment]

$V^R$ :Reasoning

$F$

$H$

$E$

$Q$

$V$

$\lambda$

$A$

$Z$

$V^I$ :Interaction

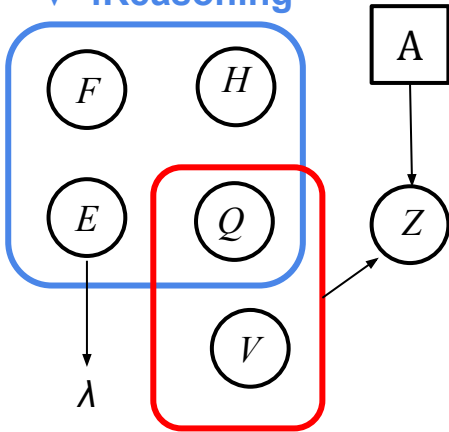

Supplement: supplementary_material [file attachment]

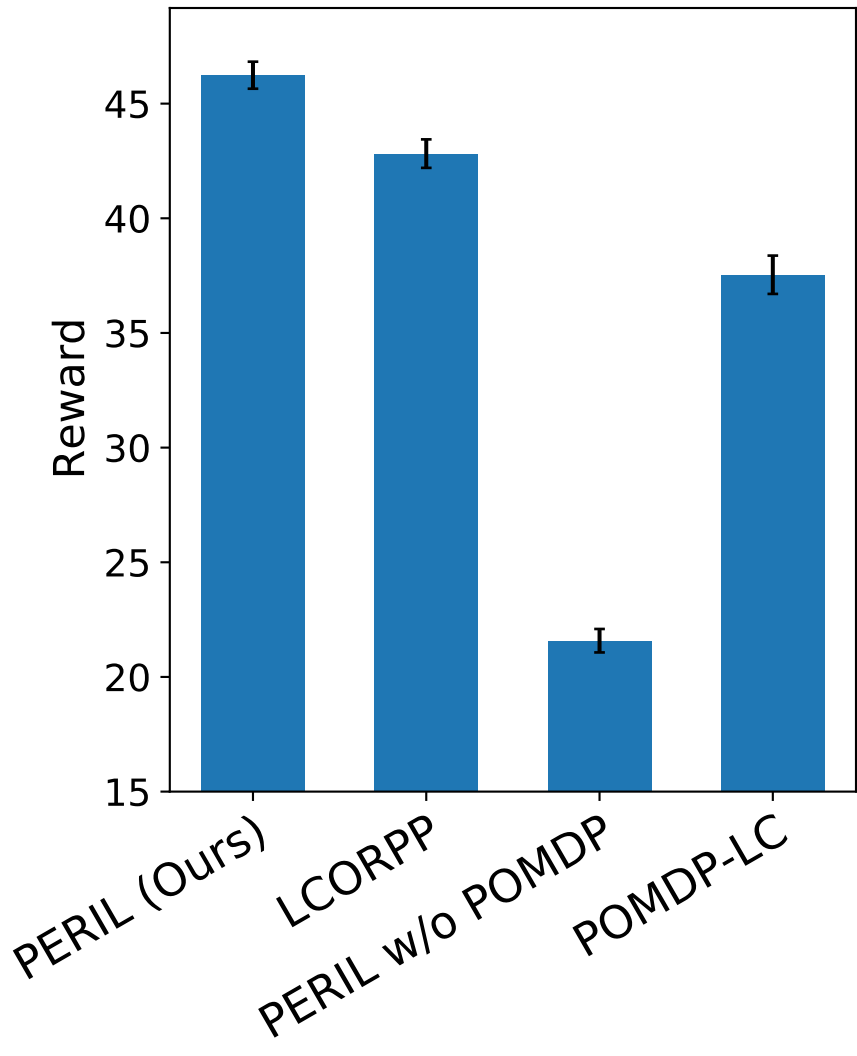

Supplement: supplementary_material [file attachment]

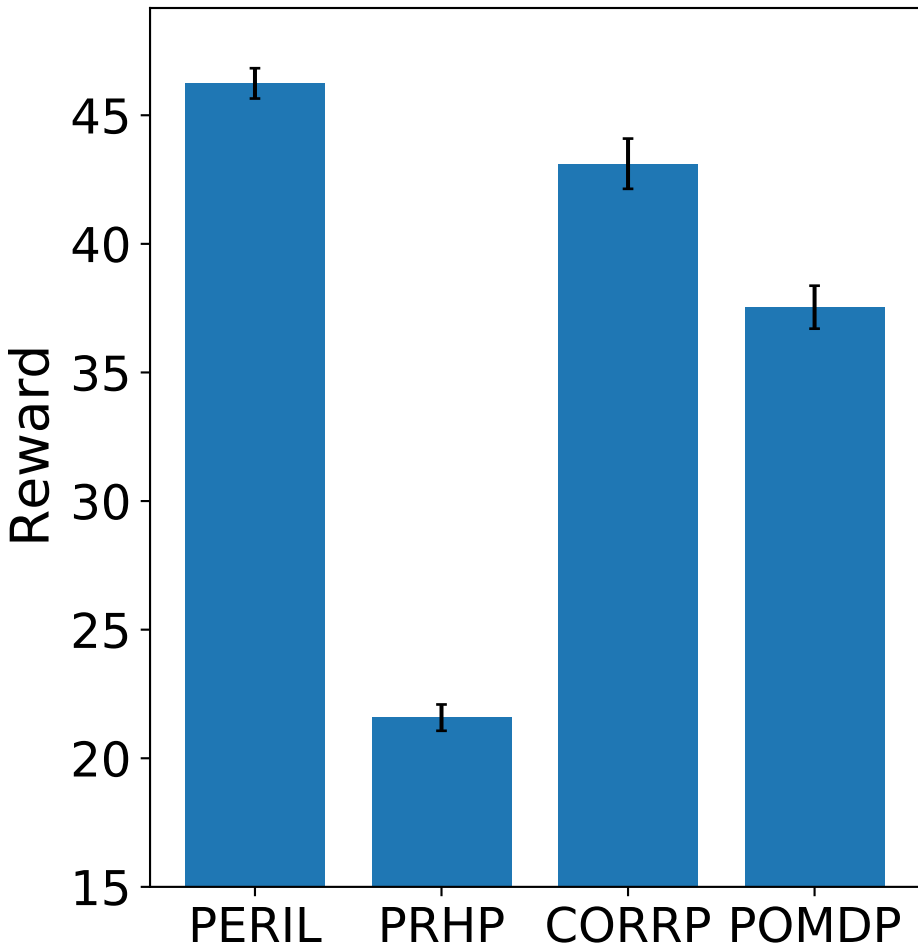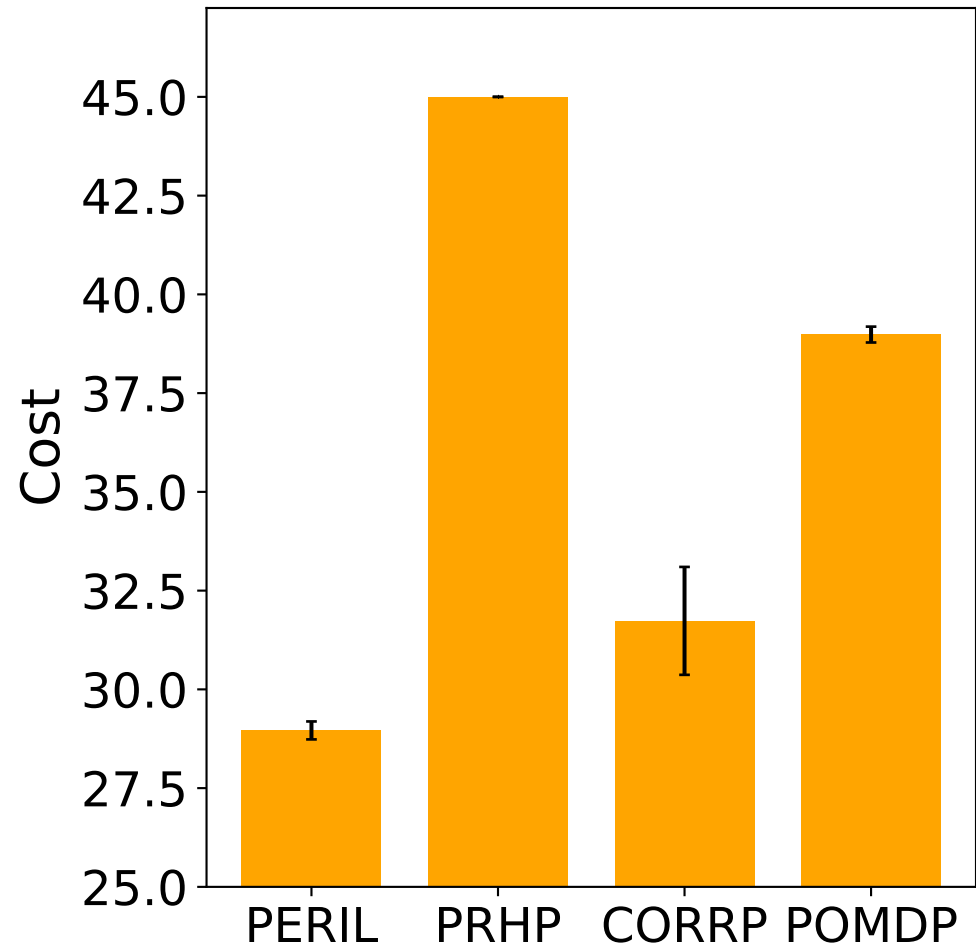

Supplement: supplementary_material [file attachment]

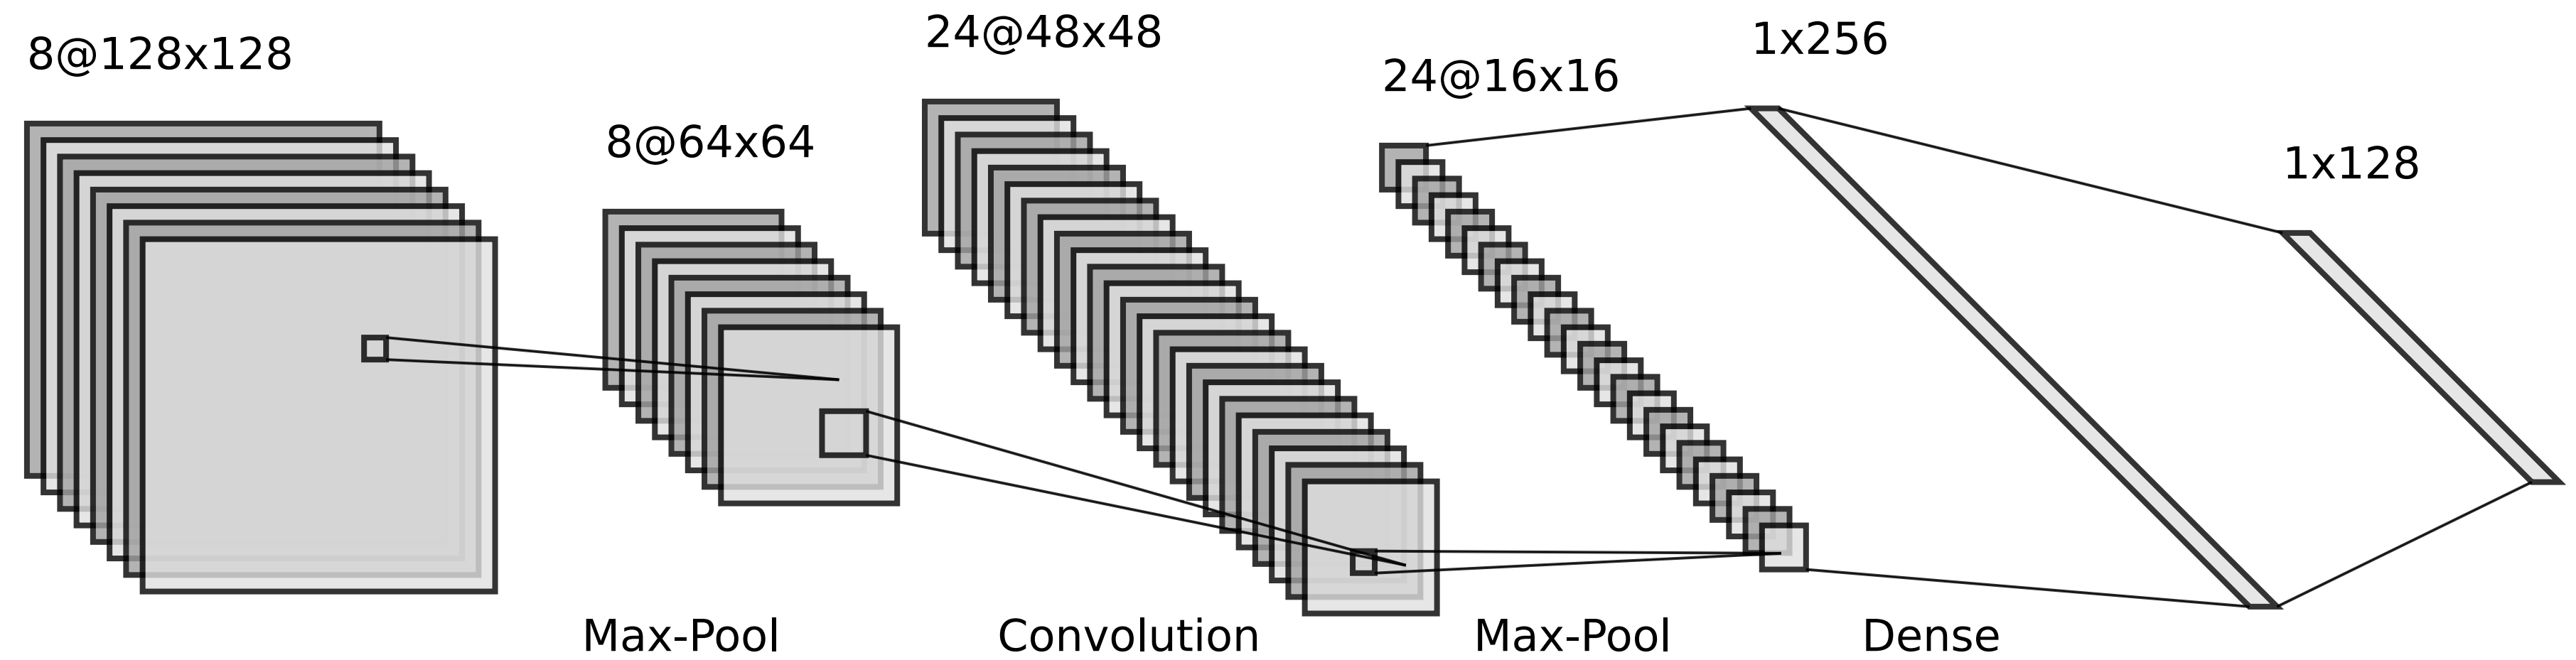

Supplement: supplementary_material [file attachment]

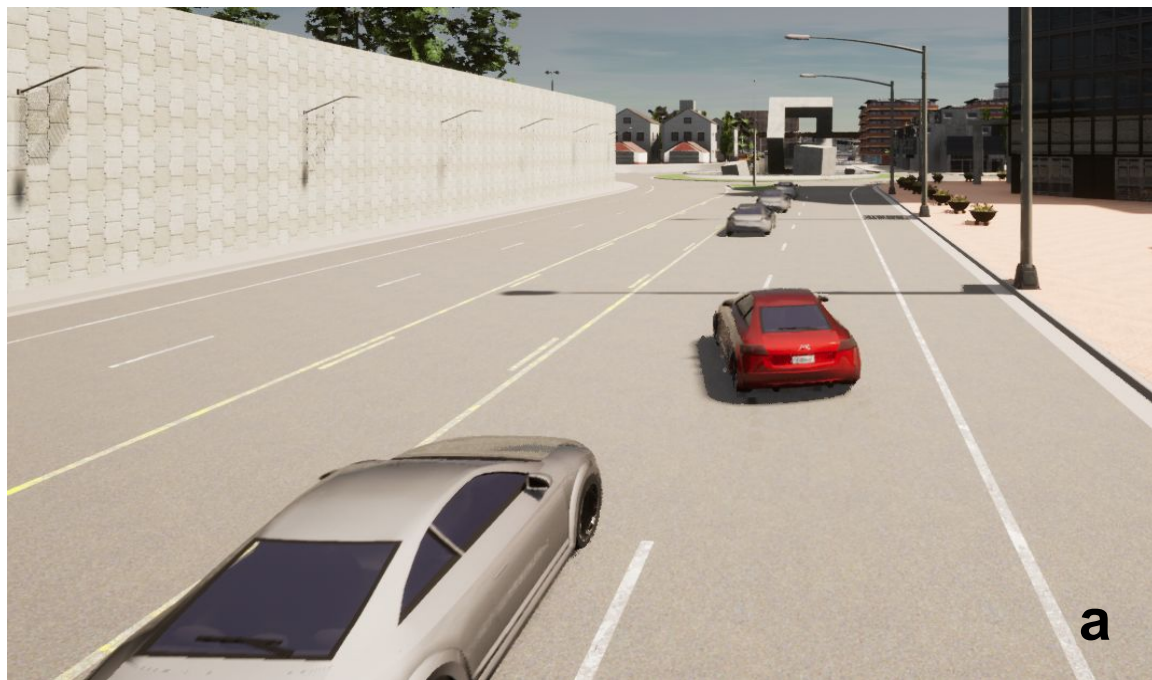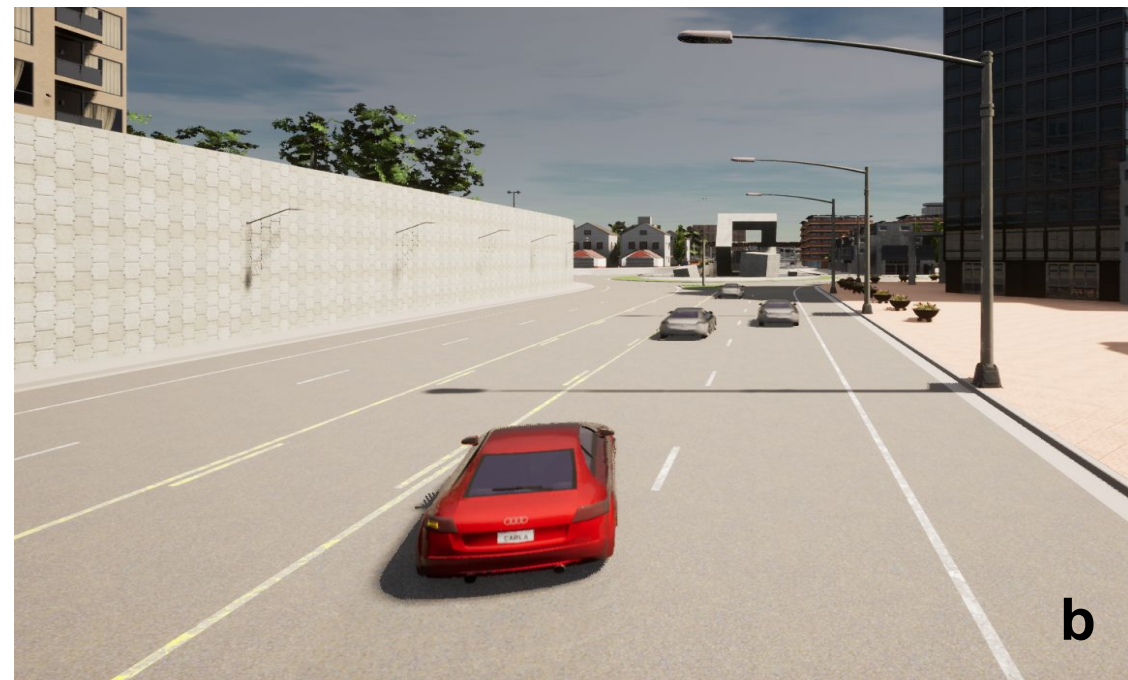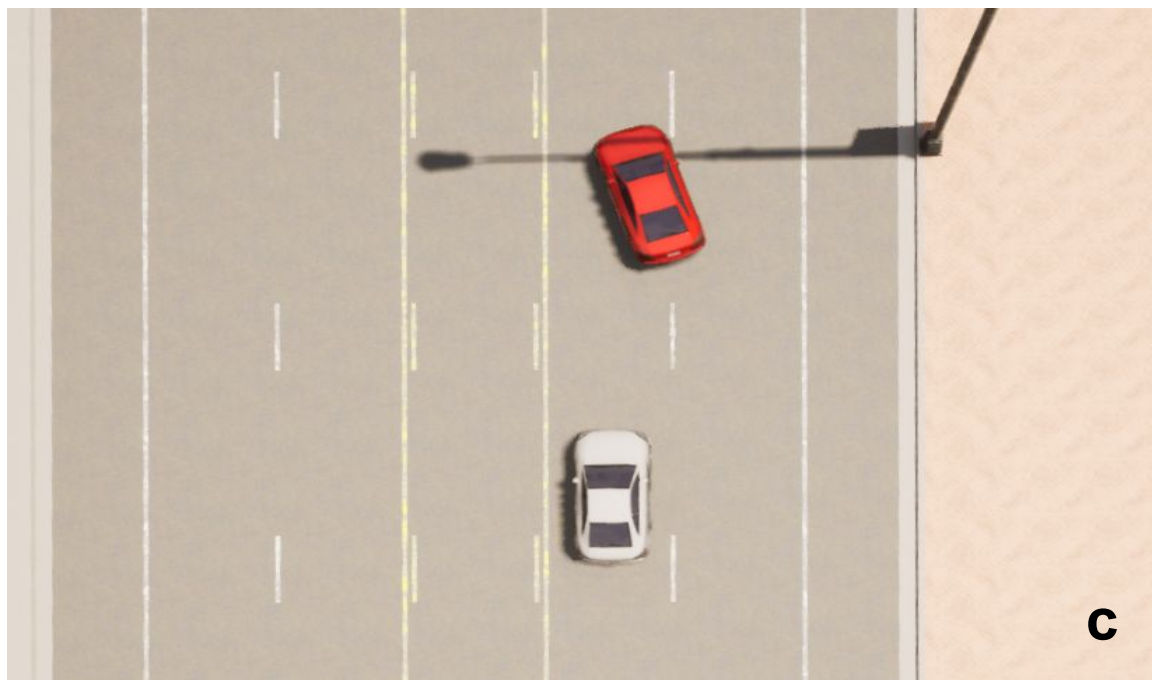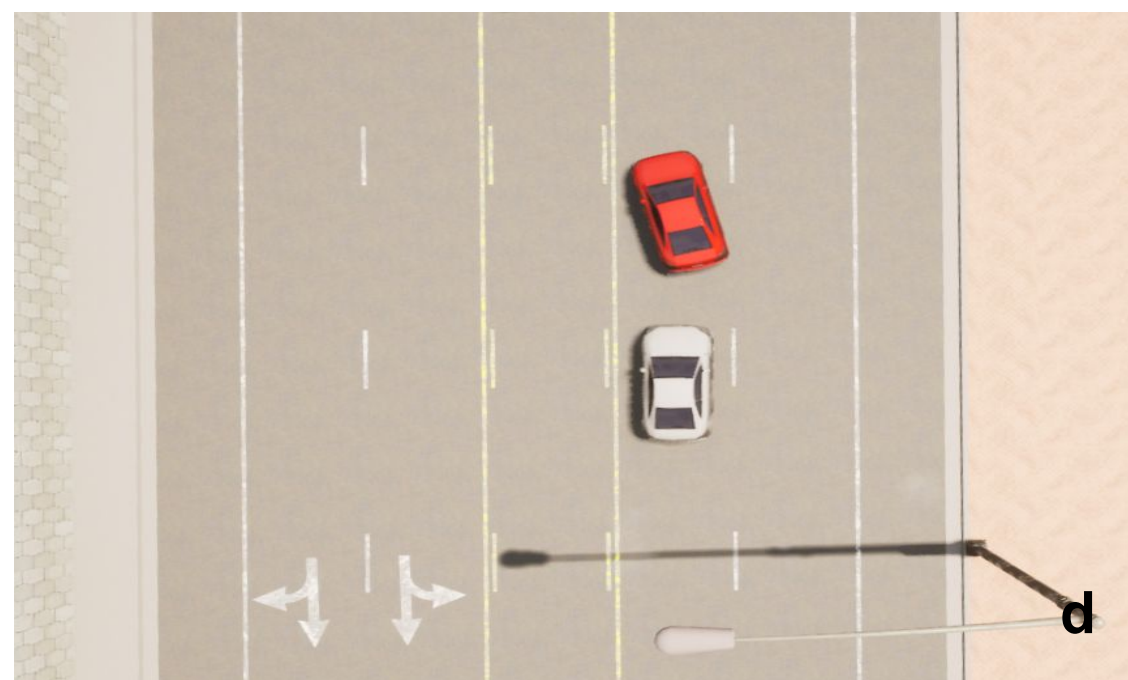

Supplement: supplementary_material [file attachment]

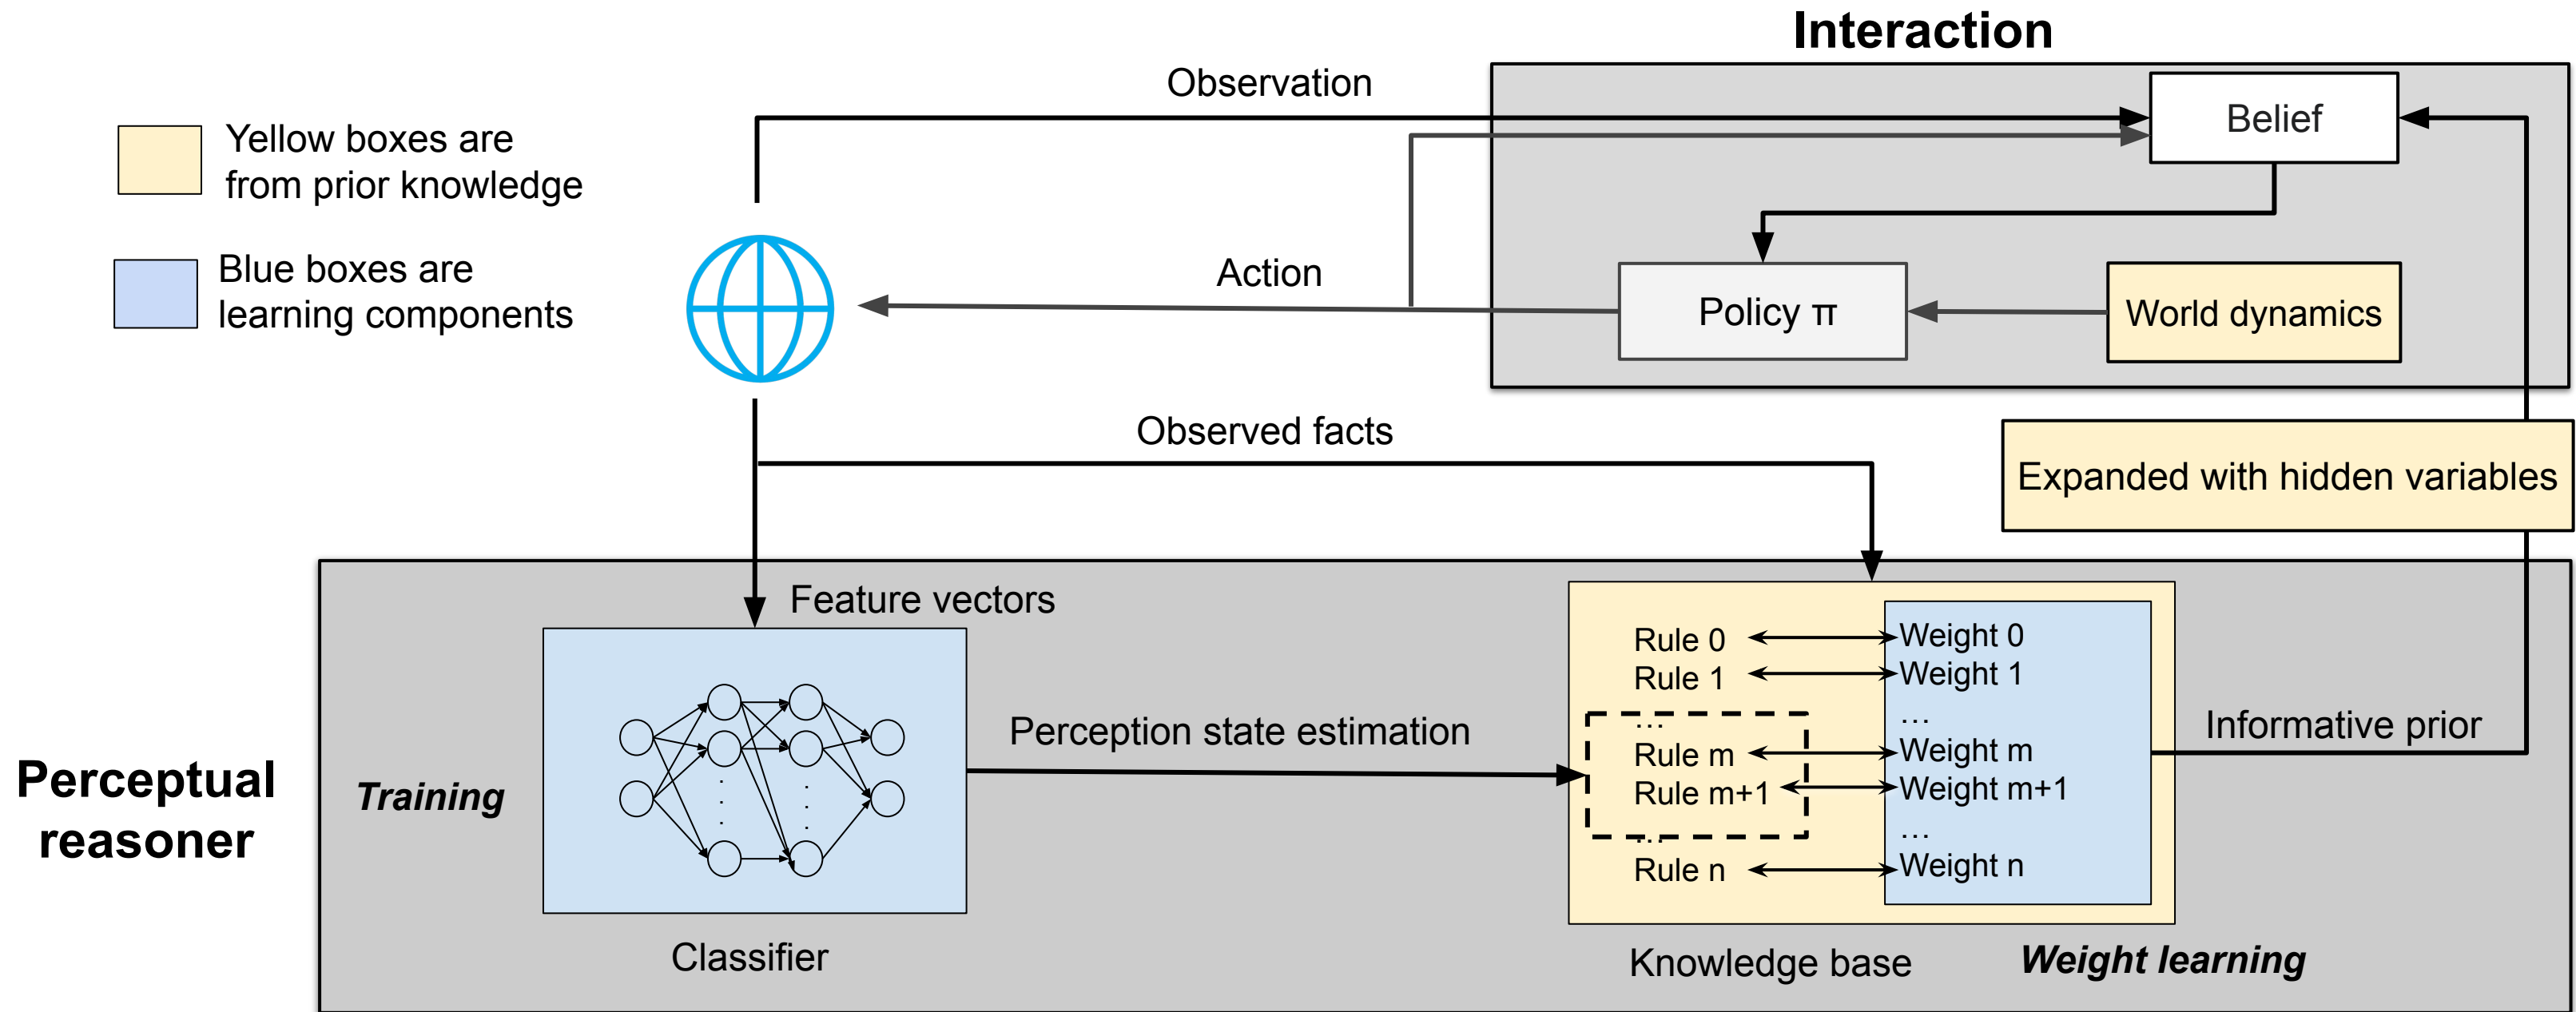

Supplement: supplementary_material [file attachment]

**Reasoning**

$F$

$H$

$E$

$Q$

$V$

$\lambda$

$A$

$Z$

**Interaction**

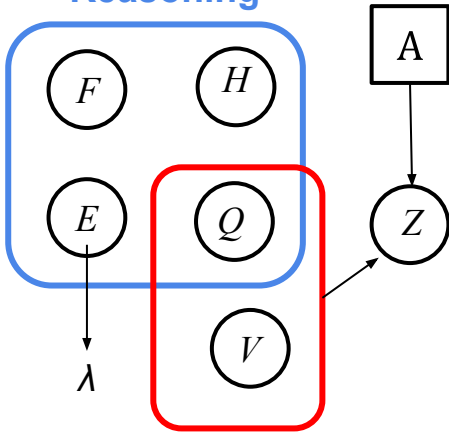

Supplement: supplementary_material [file attachment]

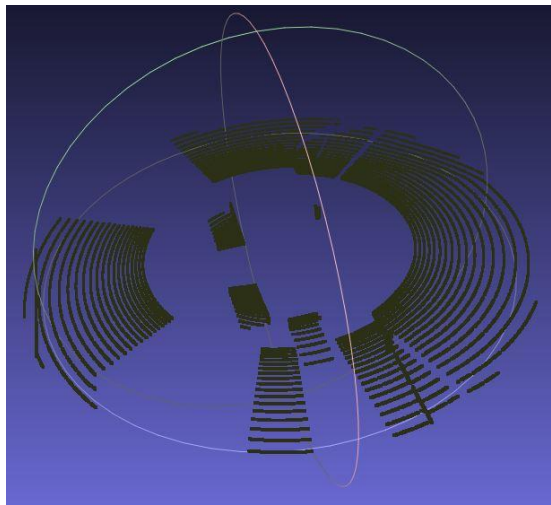

3D Lidar perception

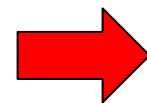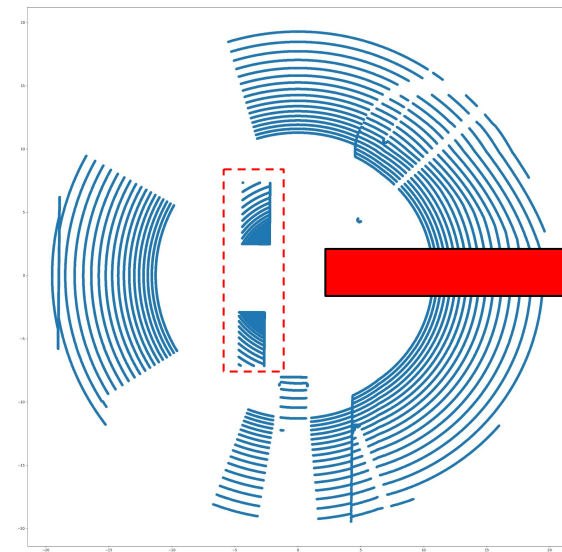

2D Lidar perception

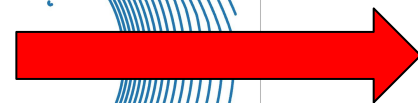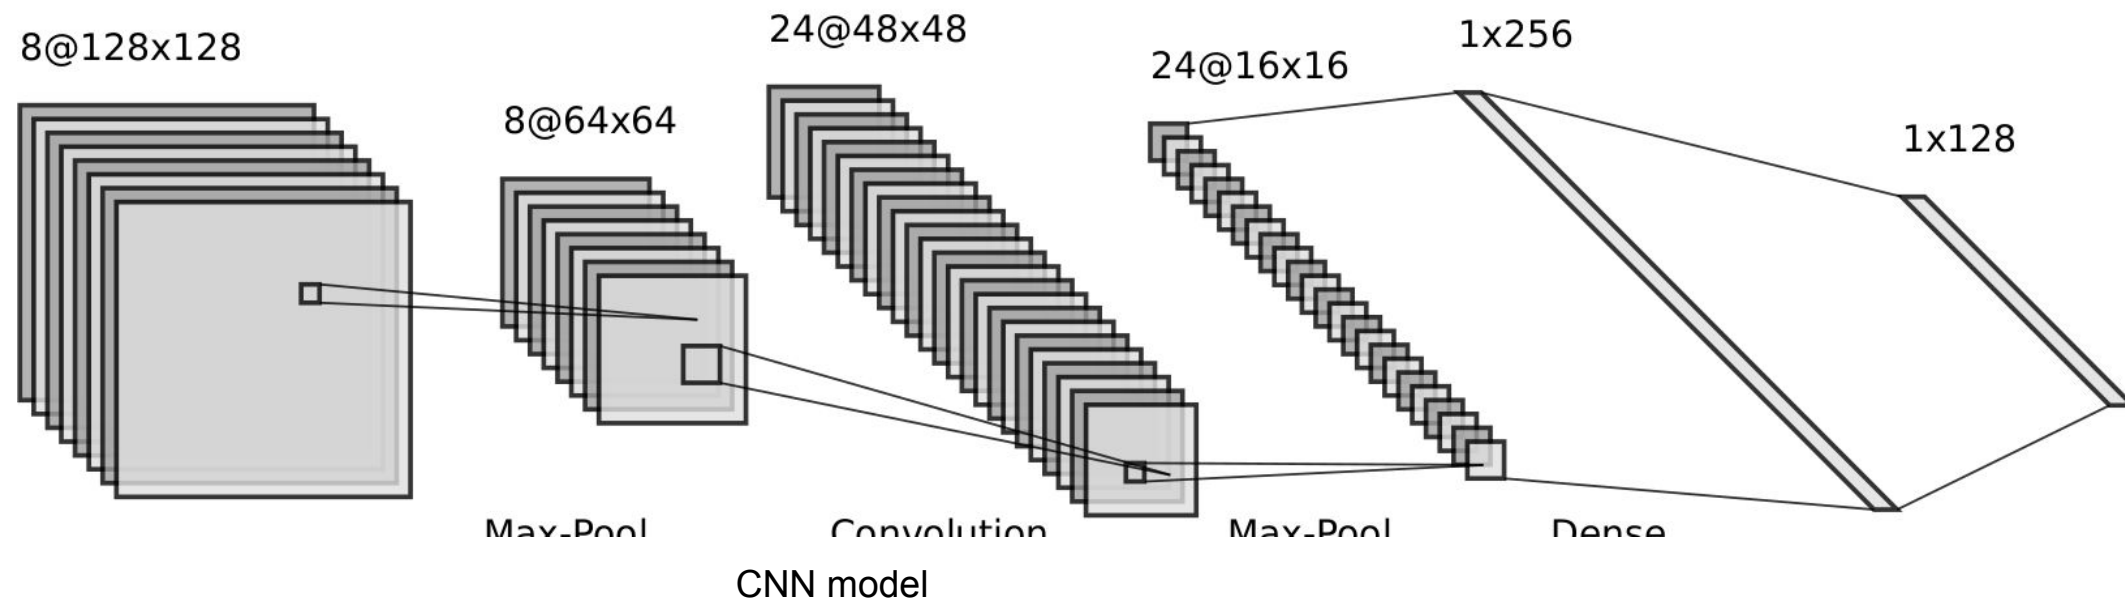

CNN model

Supplement: supplementary_material [file attachment]

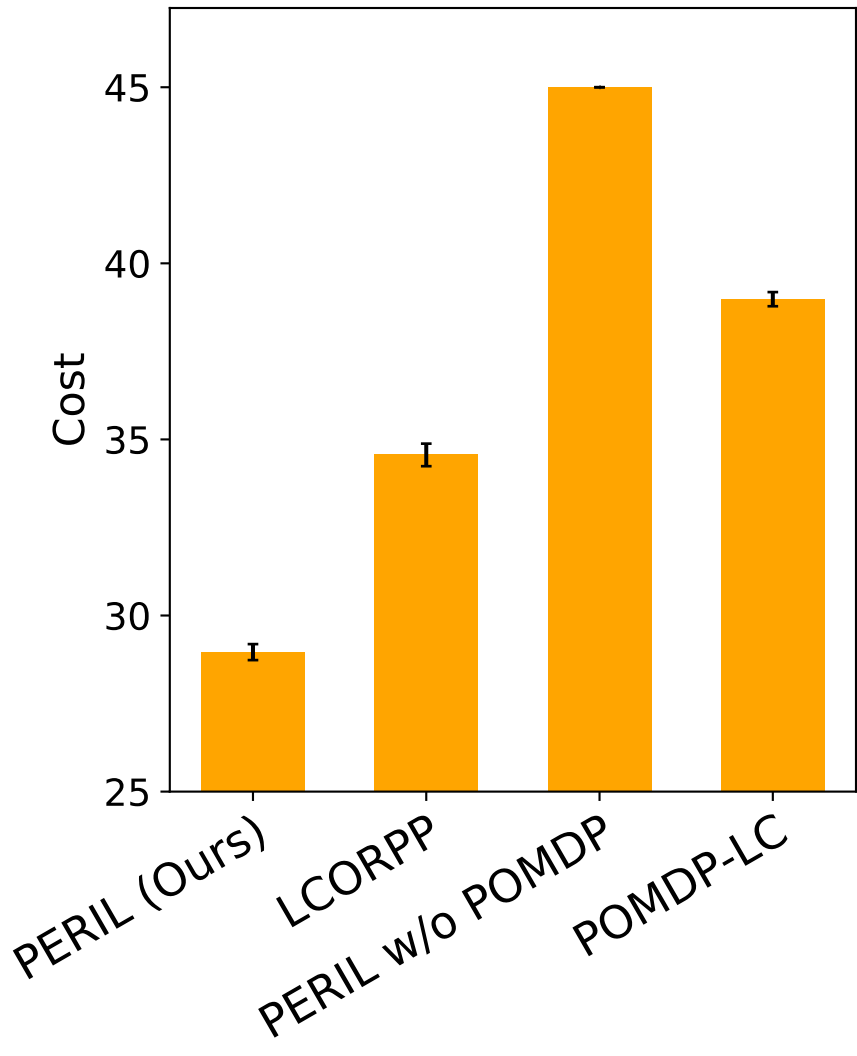

Supplement: supplementary_material [file attachment]

Perceive

Reason

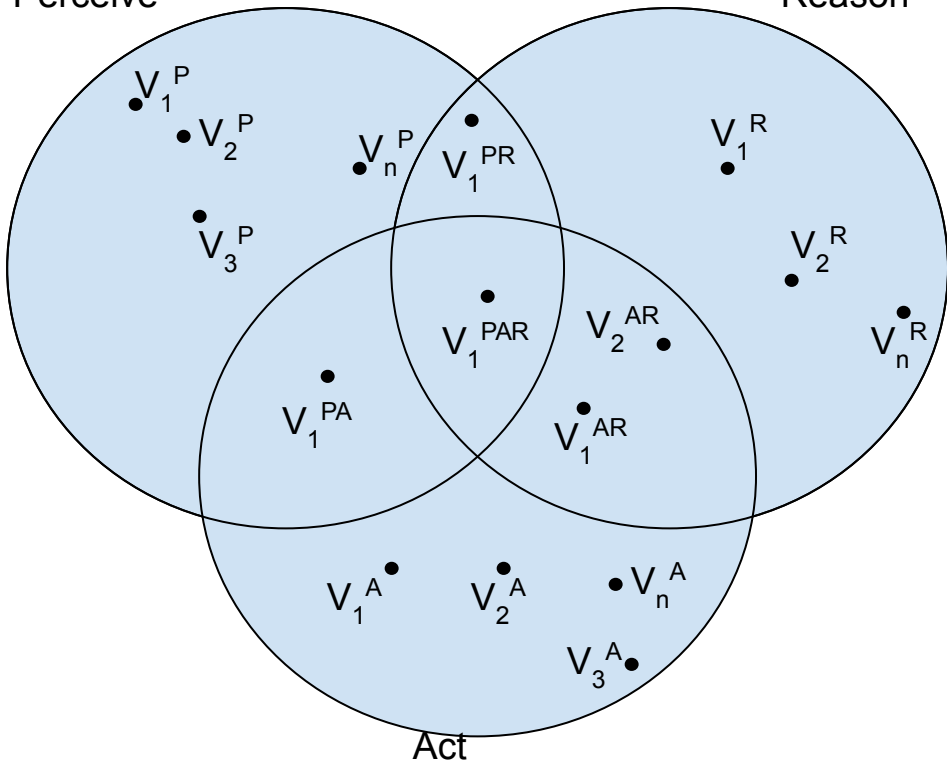

Supplement: supplementary_material [file attachment]

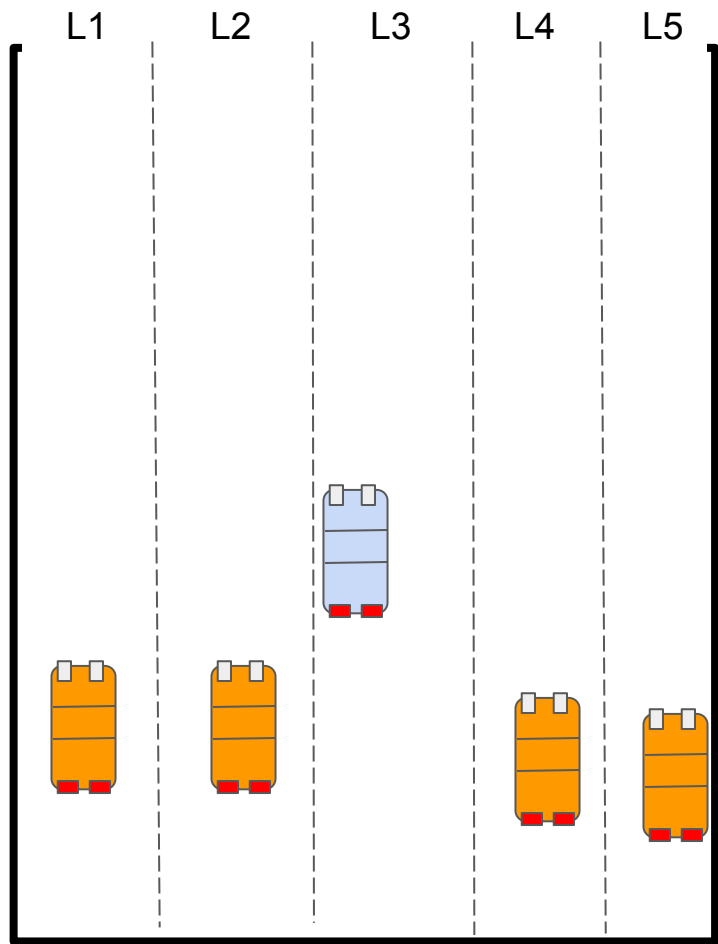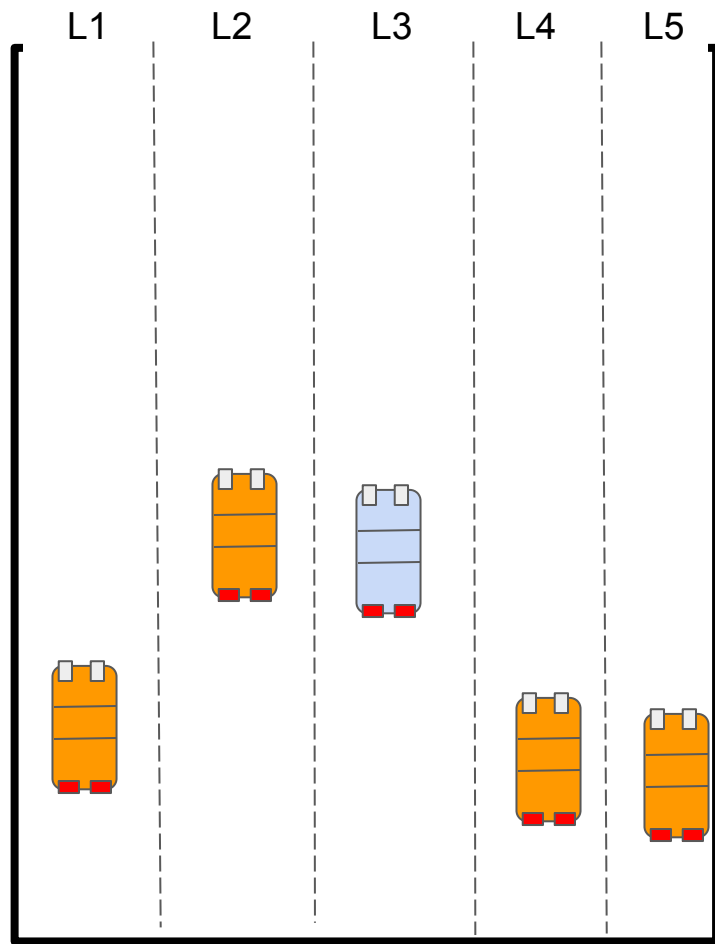

Supplement: supplementary_material [file attachment]

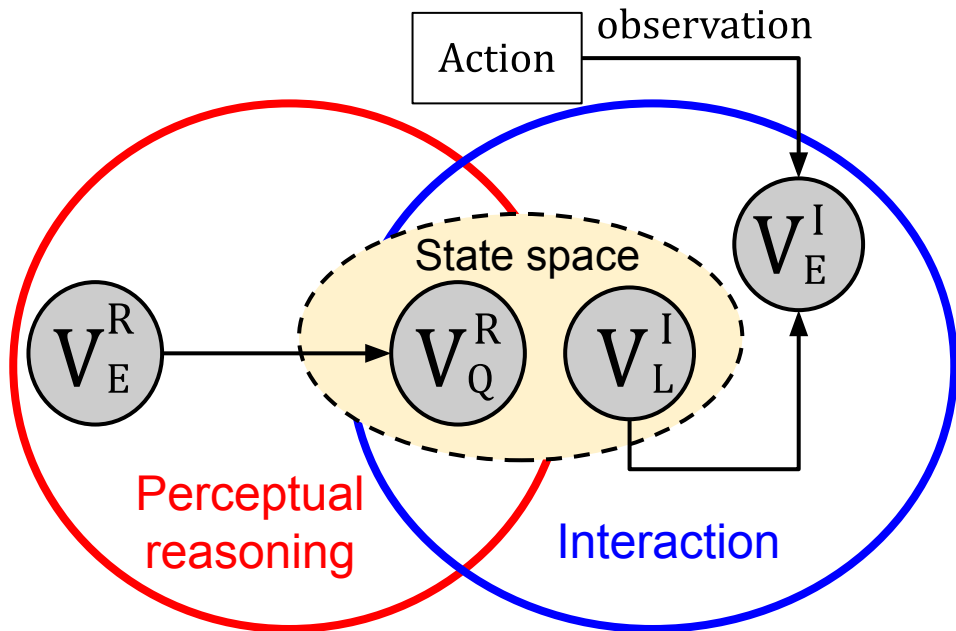

Supplement: supplementary_material [file attachment]



3D Lidar perception



2D Lidar perception

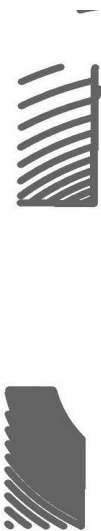

Cropped and greyscaled

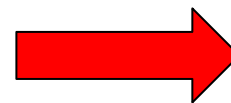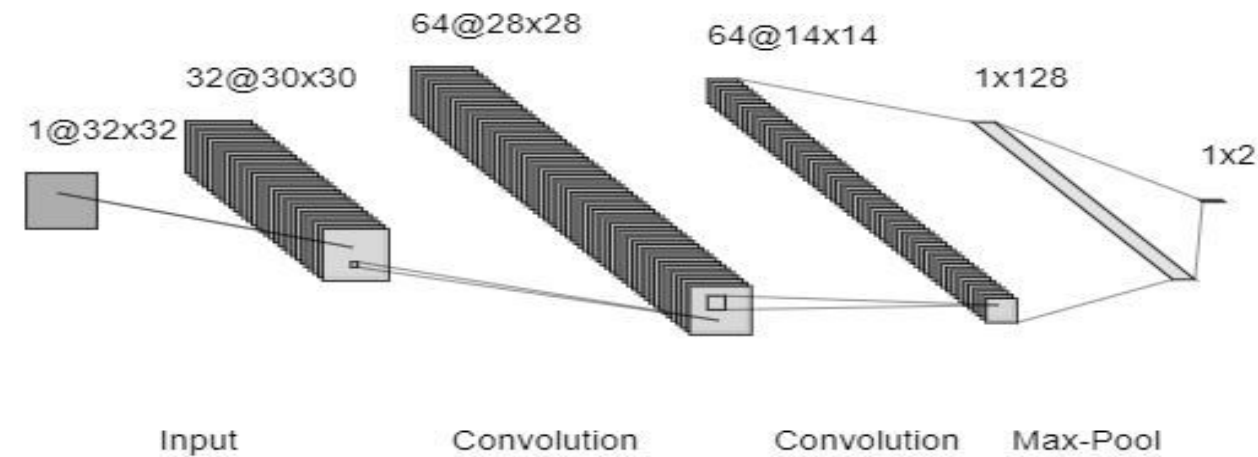

CNN model

Supplement: supplementary_material [file attachment]

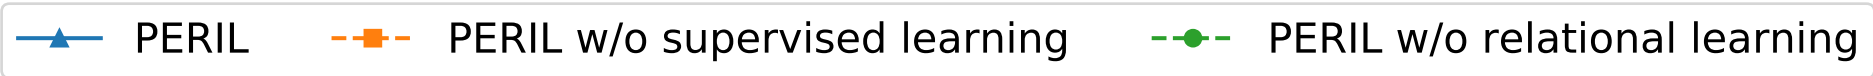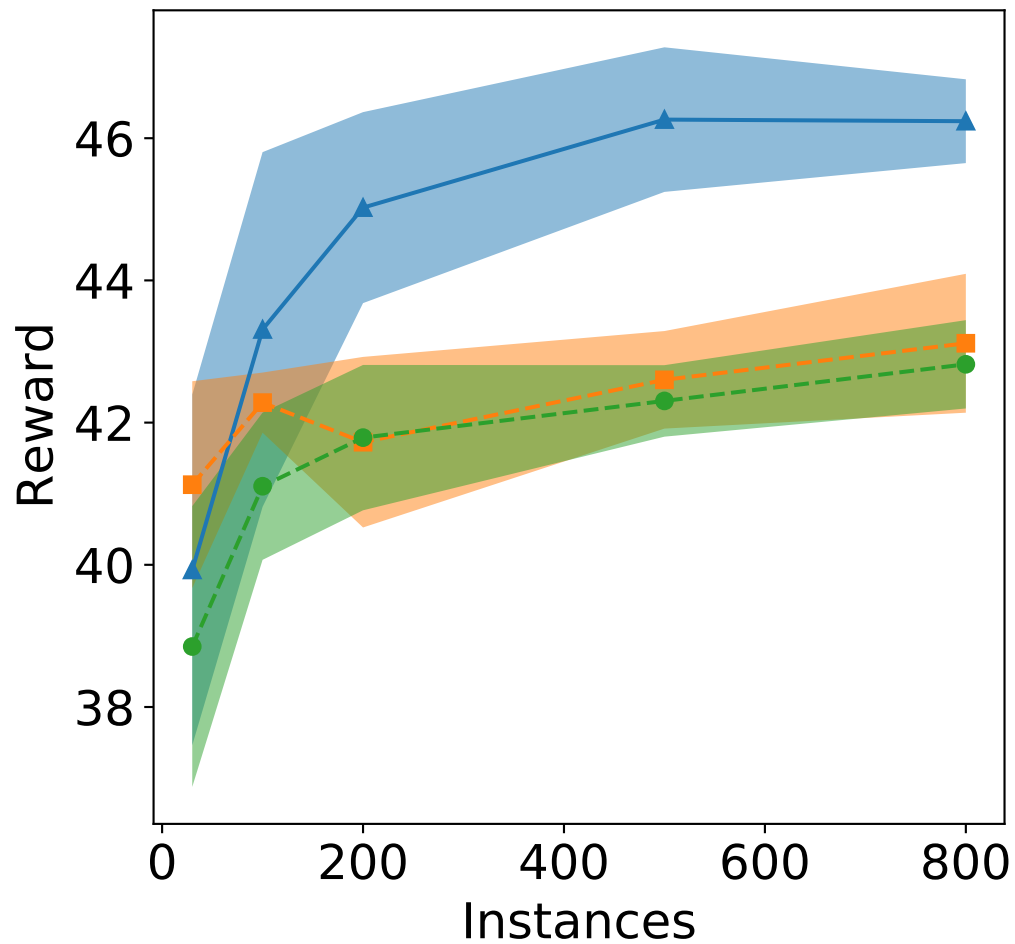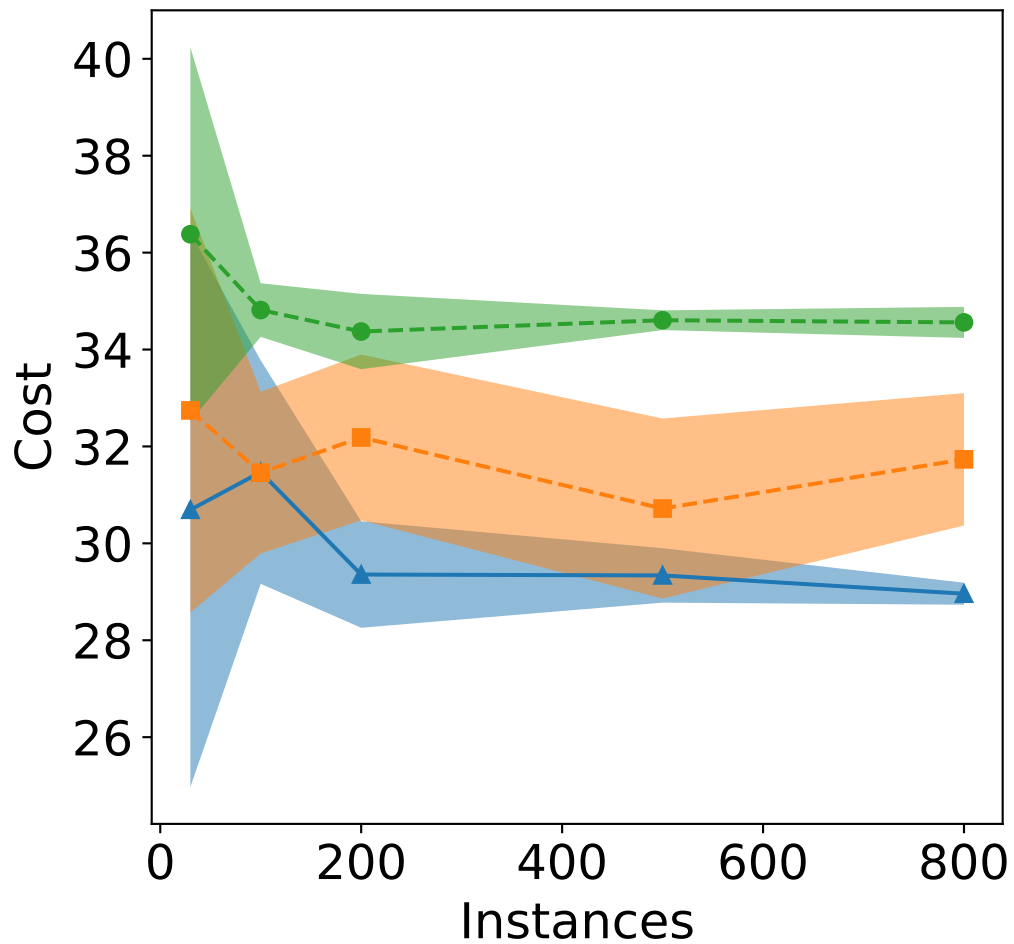

Supplement: supplementary_material [file attachment]

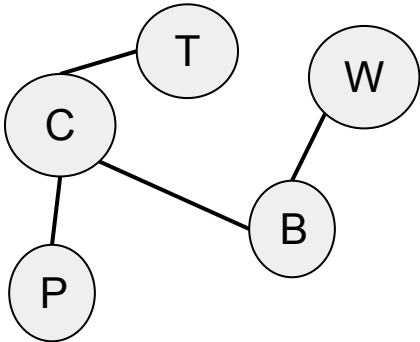

Supplement: supplementary_material [file attachment]

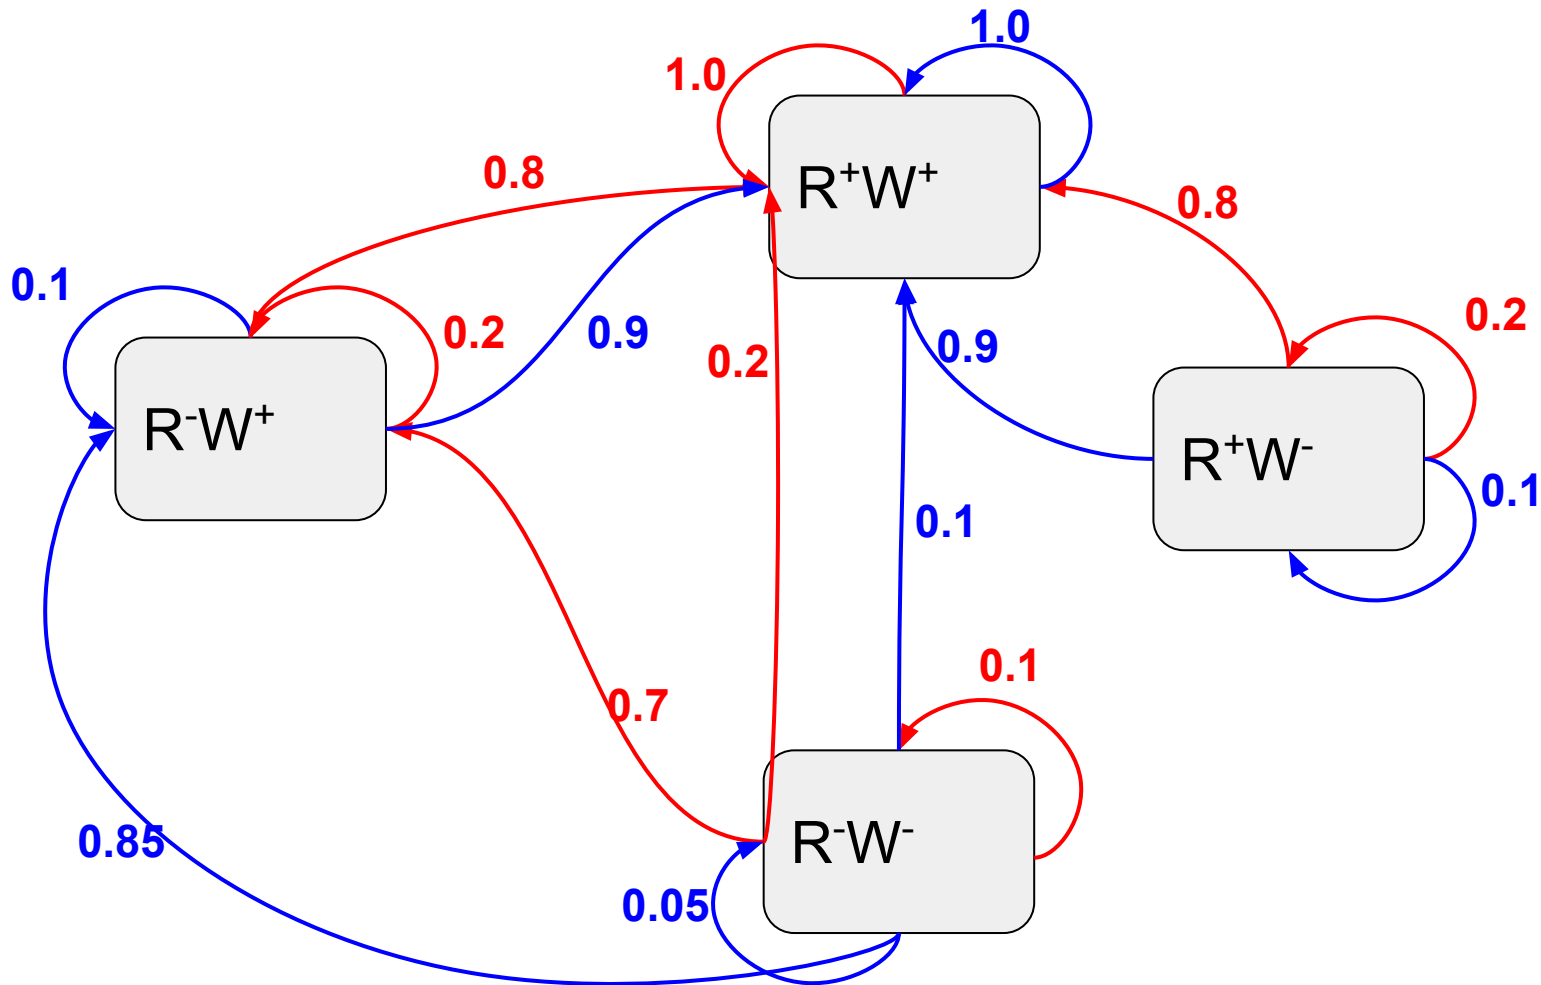

Supplement: supplementary_material [file attachment]



3D Lidar perception

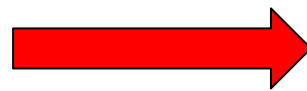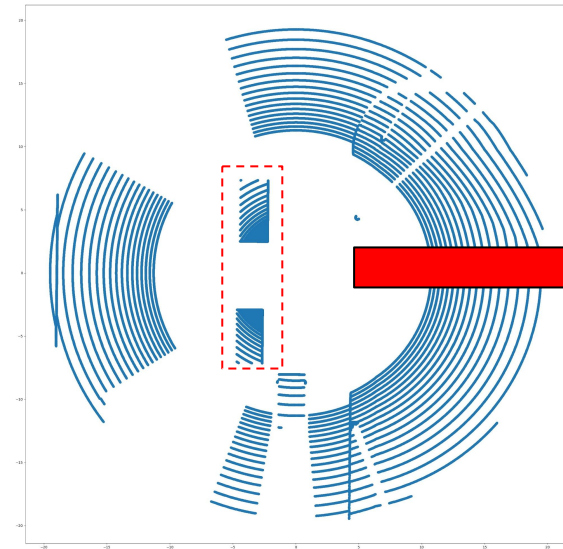

2D Lidar perception

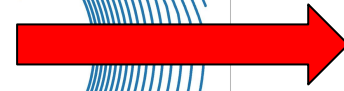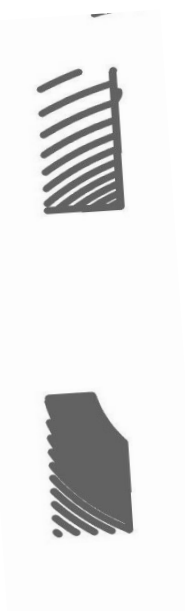

Cropped and greyscaled

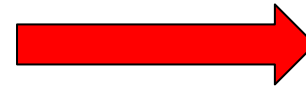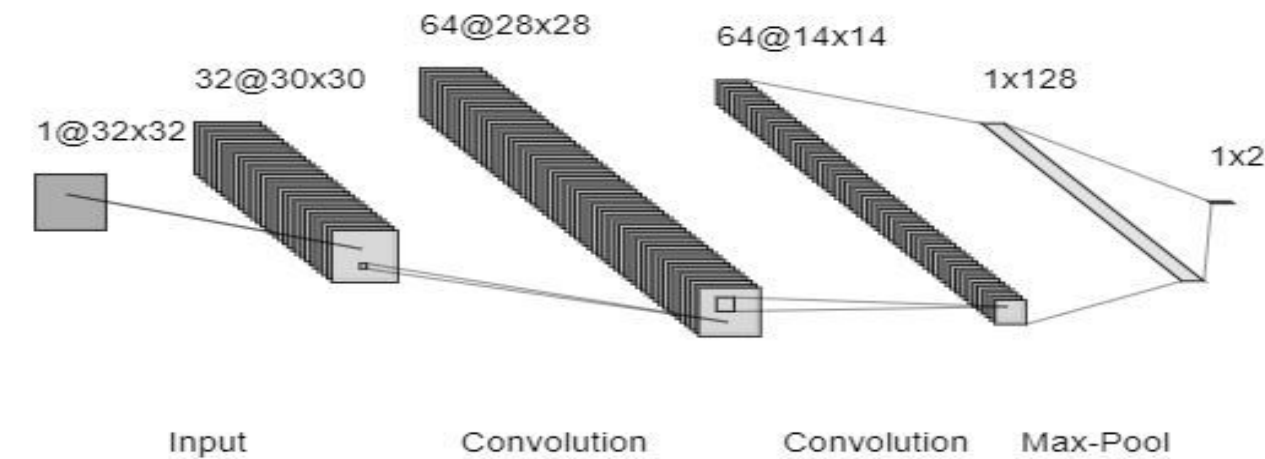

CNN model

Supplement: supplementary_material [file attachment]
